# Supplementary material for: Determining the importance of the electrode support and fabrication method during the initial screening process of an active catalyst for the oxygen evolution reaction
Source: Royal Society of Chemistry journal article supplement (doi:10.1039/c8ta02908c), 2018-01-01
Supplement: c8ta02908c1.pdf [file c8ta02908c1.pdf]

## Supporting Information

### Determining the Importance of the Electrode Support and Fabrication Method during the Initial Screening Process of an Active Catalyst for the Oxygen Evolution Reaction

Michelle P. Browne\* and Andrew Mills\*

School of Chemistry and Chemical Engineering, Queens University Belfast, UK.

**Table S1.** Summary of RuO<sub>2</sub> coated electrodes fabricated in this study

| <b>Powder to electrode fabrication method techniques (acronym):</b> | <b>Pressed disc</b>     | <b>Dropcast</b>                                                 | <b>Doctor-blade</b>                                             |
|---------------------------------------------------------------------|-------------------------|-----------------------------------------------------------------|-----------------------------------------------------------------|
| <b>Substrate materials used</b>                                     | Pt                      | Pt, Ti, GC discs<br>Ni foam*                                    | Pt, Ti                                                          |
| <b>Solvents and additives used during fabrication</b>               | None                    | ethanol, water, Nafion                                          | ethanol, water, glacial acetic acid, terpineol, ethyl cellulose |
| <b>Additional annealing steps</b>                                   | None                    | Dried at 40 °C for 30 mins<br>* dried in air for 30 mins        | 450 °C for 30 mins                                              |
| <b>Catalyst loading</b>                                             | 1.2 mg cm <sup>-2</sup> | Discs: 1.3 mg cm <sup>-2</sup><br>Foam: 1.1 mg cm <sup>-2</sup> | Approx 1 mg cm <sup>-2</sup>                                    |
| <b>Electrode naming**</b>                                           | P-metal                 | DC-metal                                                        | DB-metal                                                        |

\*\*For the electrode naming, the P-Pt stands for Pressed-Platinum i.e. Fabrication technique – material of support

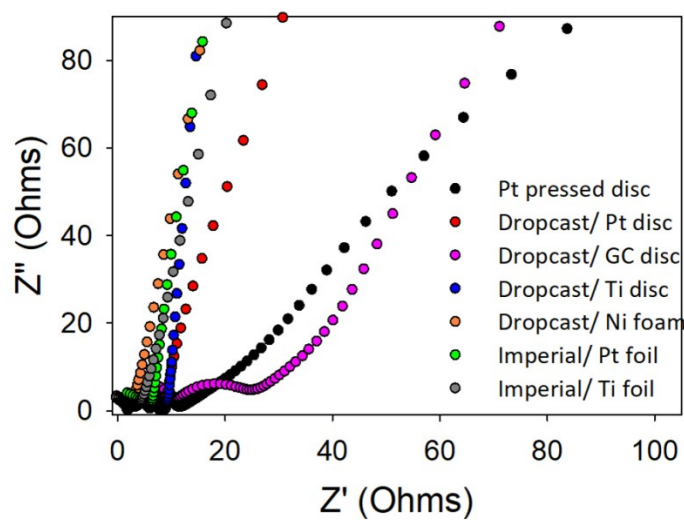

**Figure S1.** Nyquist plot of the RuO<sub>2</sub> coated Pt Pressed disc, RuO<sub>2</sub> dropcast Pt discs, GC discs, Ti disc and Ni foam and doctor-blade coated RuO<sub>2</sub> Pt and Ti foil in 1M NaOH

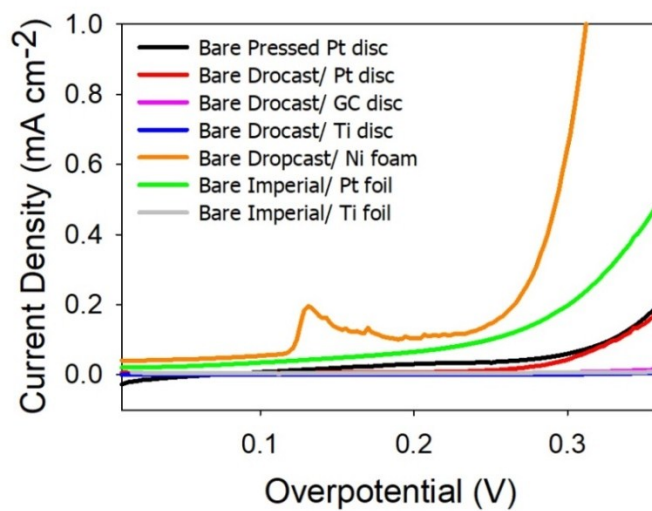

**Figure S2.** LSV curves of the bare supports at low current densities at a scan rate of 0.1 mV/s<sup>-1</sup> in 1M NaOH.

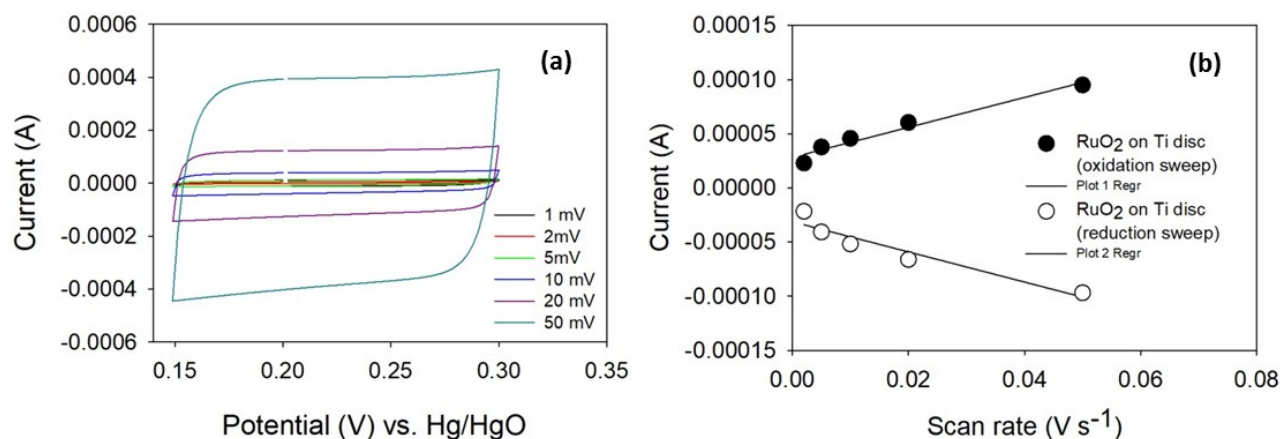

**Figure S3.** Typical Electrochemical Surface Area Measurement (ECSA) **(a)** Cyclic Voltammograms for RuO<sub>2</sub> dropcast on a Ti disc **(b)** Capacitance curves for the data in Figure (a)

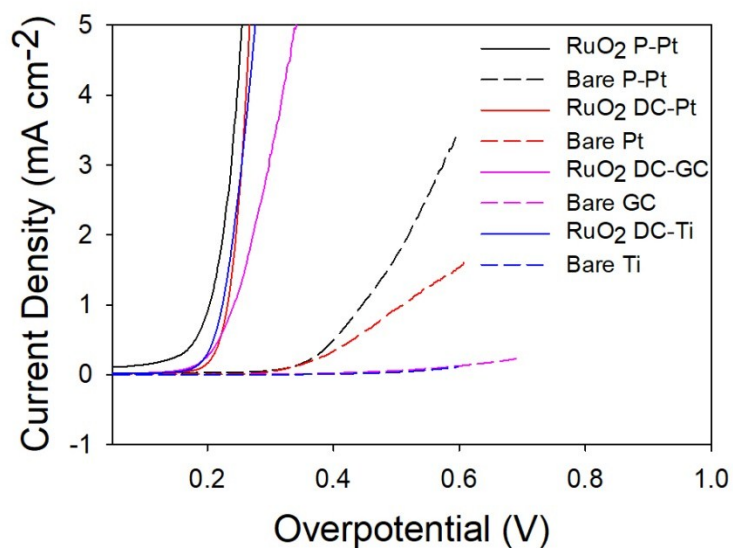

**Figure S4.** LSV curves of the RuO<sub>2</sub> coated Pt Pressed disc, RuO<sub>2</sub> dropcast Pt discs, GC discs and Ti disc (i.e. optimum support/fabrication technique combination for OER screening) at a scan rate of 0.1 mV/s<sup>-1</sup> in 1M NaOH with a rotation speed of 1600 rpm.

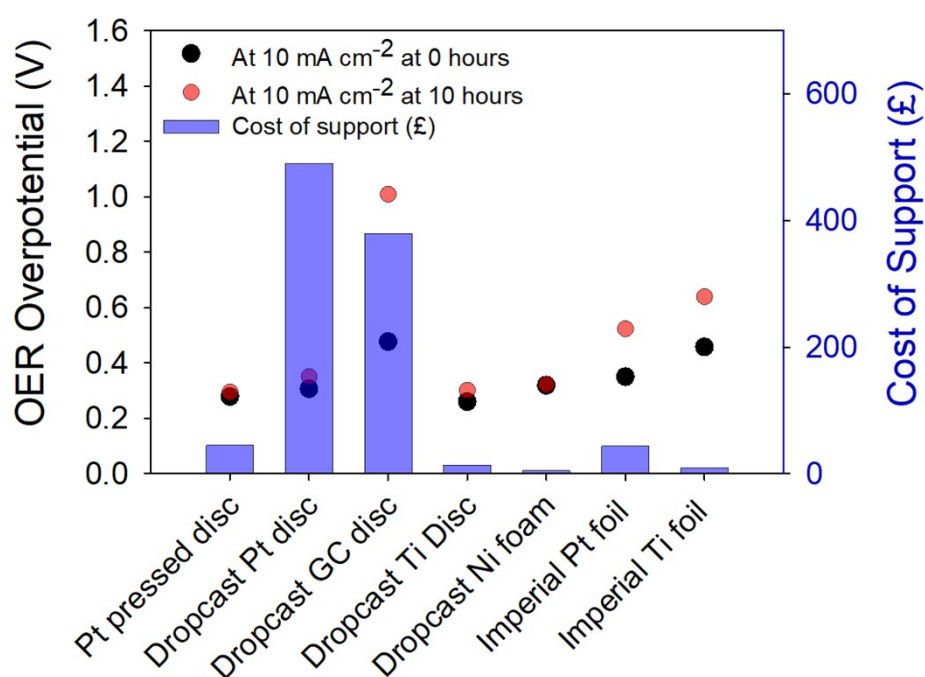

**Figure S5.** Summary of the RuO<sub>2</sub> coated electrodes OER activity at 10 mA cm<sup>-2</sup> at a time of 0 hours and at 10 mA cm<sup>-2</sup> at a time of 10 hours (from the stability tests, Figure S6) and the cost of the bare supports.

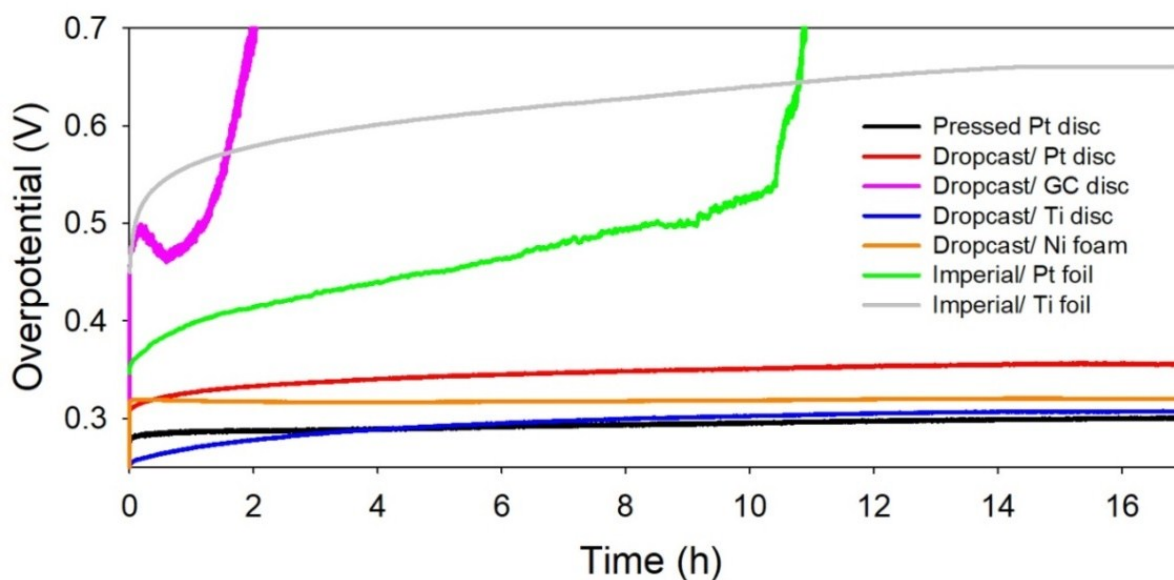

**Figure S6.** Stability curves of all the RuO<sub>2</sub> coated electrodes in 1M NaOH over 17 hours at a current density of 10 mA cm<sup>-2</sup>.
